# Supplementary material for: Preparation of Carbon-Based Solid Acid Catalyst from High-Sulfur Petroleum Coke with Nitric Acid and Ball Milling, and a Computational Evaluation of Inherent Sulfur Conversion Pathways
Source: MDPI journal article supplement (doi:10.3390/molecules28207051), 2023-10-12
Supplement: s1 [file s1]

**Electronic Supplementary Material for**

**Preparation of Carbon-Based Solid Acid Catalyst from High-Sulfur Petroleum Coke with Nitric Acid and Ball Milling, and a Computational Evaluation of Inherent Sulfur Conversion Pathways**

**Qing Huang <sup>1</sup>, Natalia M. Cabral <sup>1</sup>, Xing Tong <sup>2,3</sup>, Annelisa S. Schafranski <sup>1</sup>, Pierre Kennepohl <sup>3</sup> and Josephine M. Hill <sup>1,\*</sup>**

<sup>1</sup> Department of Chemical and Petroleum Engineering, Schulich School of Engineering, University of Calgary, 2500 University Drive NW, Calgary, AB T2N 1N4, Canada; huangq.lpec@sinopec.com (Q.H.); natalia.marianocabra@ucalgary.ca (N.M.C.); annelisaschafranski@gmail.com (A.S.S.)

<sup>2</sup> Department of Chemistry, University of British Columbia, Vancouver, BC V6T 1Z1, Canada; xing.tong@ucalgary.ca

<sup>3</sup> Department of Chemistry, University of Calgary, 2500 University Drive NW, Calgary, AB T2N 1N4, Canada; pierre.kennepohl@ucalgary.ca

\* Correspondence: jhill@ucalgary.ca; Tel.: +1-403-210-9488; Fax: +1-403-284-4852

Number of pages: 6

Number of figures: 7 (Figure S1-S7)

Number of tables: 1 (Table S1)

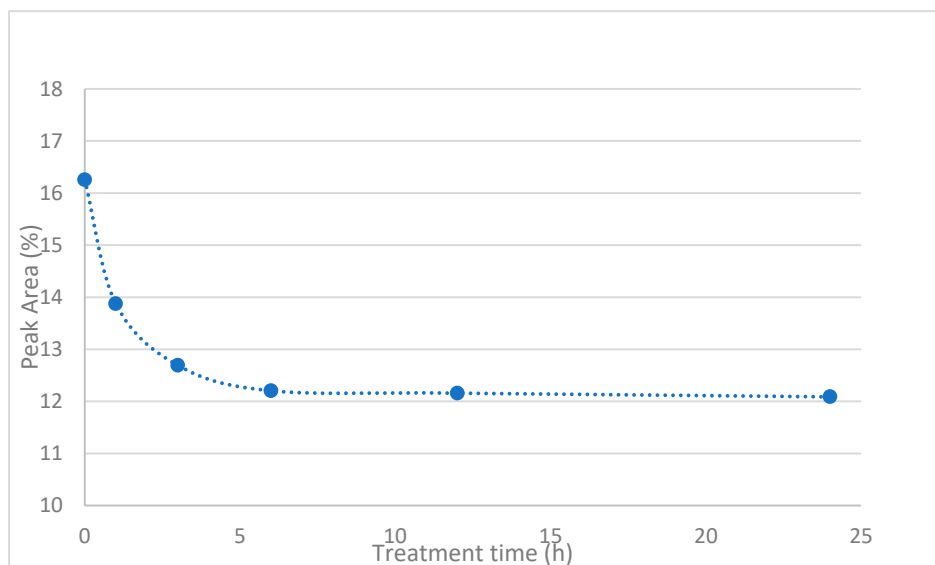

**Figure S1.** Relative area of the G band in the Raman spectra of acid-treated petcoke in percentage of total area in the 1000-1800  $\text{cm}^{-1}$  region.

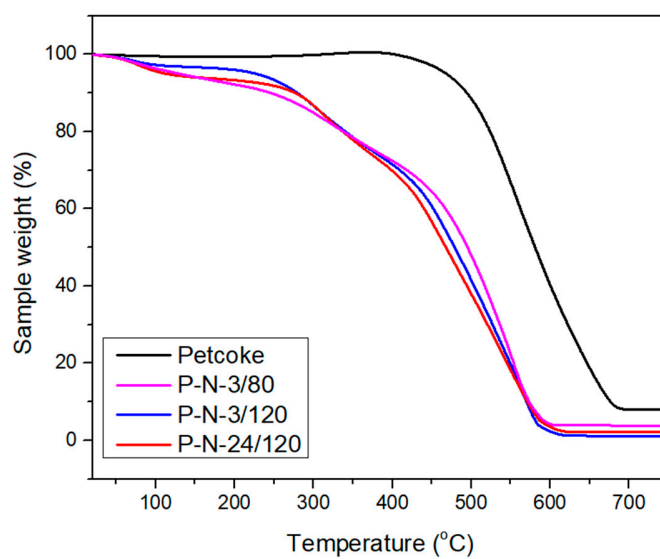

**Figure S2.** TGA profiles of petcoke and acid-treated petcoke (20  $^{\circ}\text{C}/\text{min}$  to 750  $^{\circ}\text{C}$  in a 50  $\text{mL}/\text{min}$  flow of air).

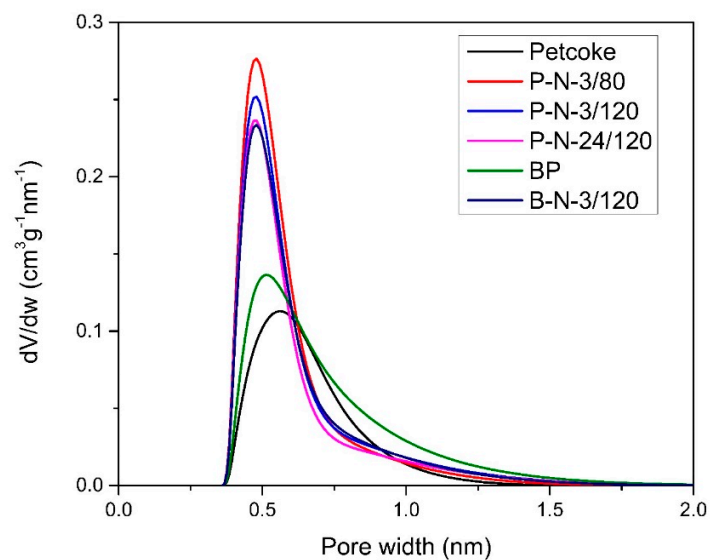

**Figure S3.** Pore size distributions of petcoke and petcoke-derived samples, as determined by CO<sub>2</sub> adsorption using a 2D-NLDFT-HS model.

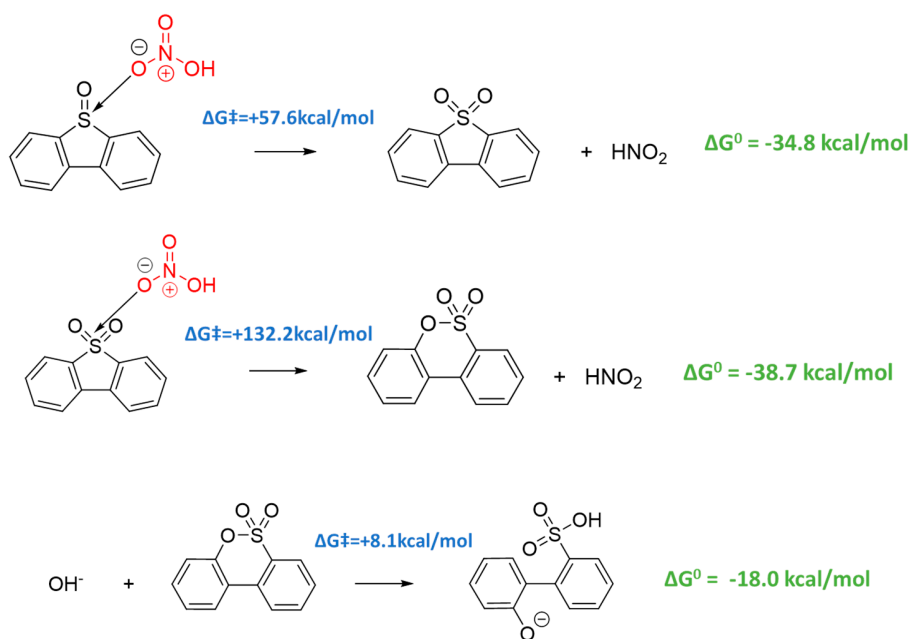

**Figure S4.** Reaction profile of DBT reacted with nitric acid (HNO<sub>3</sub>).

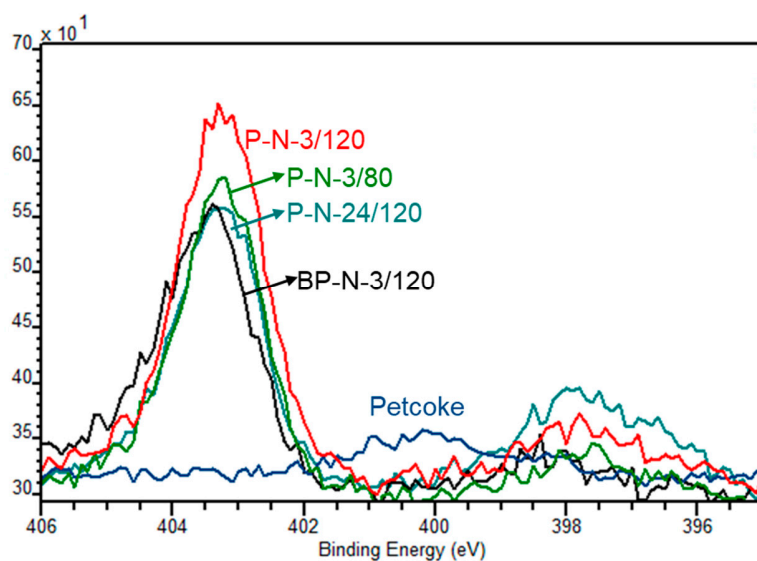

**Figure S5.** High-resolution XPS spectra of N 1s for petcoke derived solid acid catalysts.

N1s: before acid functionalization, there is little nitrogen on petcoke surface. The nitric acid resulted in the increase of nitrogen content and from the N1s spectra that  $\text{-NO}_2$  groups are the dominated nitrogen-containing groups, which the binding energy is at 405.6 eV. The peaks centered at  $\sim 400$  eV were reported as N-O, pyrrolic or pyridinic structures.<sup>1</sup> However, it could be a result of conversion of the  $\text{-NO}_2$  into  $\text{-NH}_2$  by exposing to X-ray irradiation during the XPS measurement.<sup>2</sup>

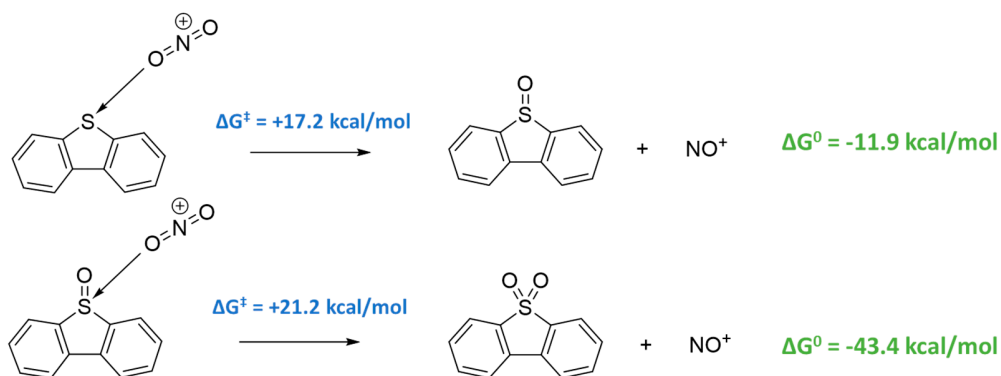

**Figure S6.** Reaction profile of DBT reacted with nitronium ion ( $\text{NO}_2^+$ ).

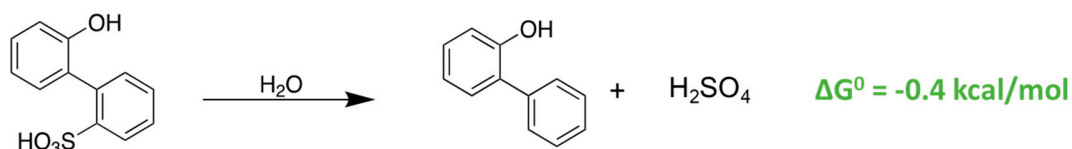

**Figure S7.** A spontaneous desulfurization reaction.

**Table S1.** Esterification of octanoic acid with methanol over different acid catalysts.

| No. | Reactants                              | Catalyst<br>(concentration of<br>catalytic acid sites)                             | Reaction<br>Conditions                            | Estimated<br>TOF (h <sup>-1</sup> ) | Productivity <sup>3</sup><br>(g·g <sup>-1</sup> ·h <sup>-1</sup> ) | Ref.         |
|-----|----------------------------------------|------------------------------------------------------------------------------------|---------------------------------------------------|-------------------------------------|--------------------------------------------------------------------|--------------|
| 1   | OA <sup>1</sup> +<br>MeOH <sup>2</sup> | H <sub>2</sub> SO <sub>4</sub>                                                     | 60 °C, OA/MeOH =<br>1/40 (molar ratio)            | 87                                  | 52.5                                                               | 3            |
| 2   | OA+ MeOH                               | Silica Ball milled<br>sulfonated petcoke<br>(3.73 mmol/g)                          | 60 °C, OA/MeOH =<br>1/40 (molar ratio)            | 85                                  | 10.3                                                               | 3            |
| 3   | OA+ MeOH                               | Ball milled sulfonated<br>petcoke (1.58 mmol/g)                                    | 60 °C, OA/MeOH =<br>1/40 (molar ratio)            | 52                                  | 7.1                                                                | 3            |
| 4   | OA+ MeOH                               | Sulfonated petcoke<br>(1.25 mmol/g)                                                | 60 °C, OA/MeOH =<br>1/40 (molar ratio)            | 48                                  | 5.6                                                                | 3            |
| 5   | OA+ MeOH                               | Sulfonated activated<br>carbon from coffee<br>residue (0.45-0.72<br>mmol/g)        | 60 °C, OA/MeOH =<br>1/3 (molar ratio)             | 25-47                               | 4.0-6.0                                                            | 4            |
| 6   | OA+ MeOH                               | Amberlyst-15 (4.7<br>mmol/g)                                                       | 60 °C, OA/MeOH =<br>1/3 (molar ratio)             | 4                                   | 3.9                                                                | 4            |
| 7   | OA +<br>MeOH                           | Hollow sulfonated<br>mesoporous carbon<br>spheres (1.43 mmol/g)                    | 75 °C, OA/MeOH<br>=1/30 (molar ratio)             | 21.7                                | 3.7                                                                | 5            |
| 8   | OA+ MeOH                               | Amberlyst-15 (4.7<br>mmol/g)                                                       | 60 °C, OA/MeOH =<br>1/20 (molar ratio)            | 6                                   | 2.8                                                                | This<br>work |
| 9   | OA+ MeOH                               | Ball milled nitric acid<br>oxidized high sulfur<br>petroleum coke (0.12<br>mmol/g) | 60 °C, OA/MeOH =<br>1/20 (molar ratio)            | 143                                 | 1.9                                                                | This<br>work |
| 10  | OA+ MeOH                               | Sulfonated chitosan<br>(3.17 mmol/g)                                               | 60 °C, OA/MeOH =<br>1/95 (molar ratio)            | 114                                 | 1.3                                                                | 6            |
| 11  | Oleic acid<br>+MeOH                    | Carbonized and<br>sulfonated spent coffee<br>grounds (3.36 mmol/g)                 | 80 °C, oleic<br>acid/MeOH = 1/10<br>(molar ratio) | -                                   | 1.3                                                                | 7            |
| 12  | OA+ MeOH                               | Nitric acid oxidized<br>high sulfur petroleum<br>coke (0.08 mmol/g)                | 60 °C, OA/MeOH =<br>1/20 (molar ratio)            | 114                                 | 1.1                                                                | This<br>work |
| 13  | OA+ MeOH                               | Acid-activated clay<br>(smectite) (0.57<br>mmol/g)                                 | 100 °C, OA/MeOH =<br>1/3 (molar ratio)            | 12                                  | 0.7                                                                | 8            |

<sup>1</sup>. OA, octanoic acid; <sup>2</sup>. MeOH, methanol; <sup>3</sup>. gram of product per gram of catalyst and per hour.

## References:

1. J.J. Ternero-Hidalgo, J.M. Rosas, J. Palomo, M.J. Valero-Romero, J. Rodríguez-Mirasol, T. Cordero, Functionalization of activated carbons by HNO<sub>3</sub> treatment: Influence of phosphorus surface groups, *Carbon N. Y.* 101 (2016) 409–419.  
<https://doi.org/10.1016/j.carbon.2016.02.015>.
2. P. Mendes, M. Belloni, M. Ashworth, C. Hardy, K. Nikitin, D. Fitzmaurice, K. Critchley, S. Evans, J. Preece, A novel example of X-ray-radiation-induced chemical reduction of an aromatic nitro-group-containing thin film on SiO<sub>2</sub> to an aromatic amine film, *ChemPhysChem.* 4 (2003) 884–889. <https://doi.org/10.1002/cphc.200300699>.
3. Xiao, Y.; Hill, J. M. Solid Acid Catalysts Produced by Sulfonation of Petroleum Coke : Dominant Role of Aromatic Hydrogen. *Chemosphere* 2020, 248, 125981.  
<https://doi.org/10.1016/j.chemosphere.2020.125981>.
4. Ngaosuwan, K.; Goodwin, J. G.; Prasertdham, P. A Green Sulfonated Carbon-Based Catalyst Derived from Coffee Residue for Esterification. *Renew. Energy* 2016, 86, 262–269.  
<https://doi.org/10.1016/j.renene.2015.08.010>.
5. Lili Huang, Caicheng Song, Yingcen Liu, Hua Lin, Wanyue Ye, He Huang, Rongwen Lu, Shufen Zhang, Enhancement of catalytic esterification by tuning molecular diffusion in sulfonated carbon, *Microporous and Mesoporous Materials*, 2021, 318, 111024,  
<https://doi.org/10.1016/j.micromeso.2021.111024>.
6. Castanheiro, J. Chitosan with Sulfonic Groups: A Catalyst for the Esterification of Caprylic Acid with Methanol. *Polymers* 2021, 13, 3924. <https://doi.org/10.3390/polym13223924>.
7. Agapay, R.C., Liu, H.C., Ju, Y.H. et al. Synthesis and Initial Evaluation of Solid Acid Catalyst Derived from Spent Coffee Grounds for the Esterification of Oleic Acid and Methanol. *Waste Biomass Valor.* 2021, 12, 4387–4397. <https://doi.org/10.1007/s12649-020-01325-6>.
8. Rezende, M. J. C.; Pinto, A. C. Esterification of Fatty Acids Using Acid-Activated Brazilian Smectite Natural Clay as a Catalyst. *Renew. Energy* 2016, 92, 171–177.  
<https://doi.org/10.1016/j.renene.2016.02.004>.
